# Supplementary material for: Evolutionary history of dimethylsulfoniopropionate (DMSP) demethylation enzyme DmdA in marine bacteria
Source: PeerJ journal article supplement (doi:10.7717/peerj.9861), 2020-09-10
Supplement: Figure_S9b.pdf [file Figure_S9b.pdf]

|                            | 10   | 20   | 30   | 40    | 50   | 60    | 70    | 80   | 90     | 100  | 110  | 120    | 130   | 140  | 150    | 160   | 170   | 180  | 190  | 200   | 210  | 220   | 230  | 240  | 250   | 260  | 270  | 280   |      |      |       |     |      |      |      |       |      |      |      |      |     |    |    |     |     |     |     |    |    |    |    |    |    |    |    |    |    |    |    |    |    |    |    |    |    |    |    |    |    |    |    |    |      |      |      |      |    |    |    |    |    |    |    |    |    |    |    |    |    |    |    |    |    |    |    |    |    |    |    |    |    |   |    |    |    |    |    |    |    |    |    |   |   |   |    |   |   |   |   |   |   |   |   |   |   |   |   |   |   |   |   |   |   |   |   |   |   |   |   |   |   |   |   |   |   |   |   |   |   |   |   |   |   |   |   |   |   |   |   |   |   |   |   |   |   |   |   |   |   |   |   |   |   |   |   |   |   |   |   |    |   |   |   |   |   |   |   |   |   |   |   |   |   |   |   |   |   |   |   |   |   |   |   |   |   |   |   |   |   |   |   |   |   |   |   |   |   |   |   |   |   |   |   |   |   |   |   |   |   |   |   |   |   |   |   |   |   |   |   |   |   |   |   |   |     |   |   |   |   |   |   |   |   |   |   |   |   |   |   |   |   |   |   |
|----------------------------|------|------|------|-------|------|-------|-------|------|--------|------|------|--------|-------|------|--------|-------|-------|------|------|-------|------|-------|------|------|-------|------|------|-------|------|------|-------|-----|------|------|------|-------|------|------|------|------|-----|----|----|-----|-----|-----|-----|----|----|----|----|----|----|----|----|----|----|----|----|----|----|----|----|----|----|----|----|----|----|----|----|----|------|------|------|------|----|----|----|----|----|----|----|----|----|----|----|----|----|----|----|----|----|----|----|----|----|----|----|----|----|---|----|----|----|----|----|----|----|----|----|---|---|---|----|---|---|---|---|---|---|---|---|---|---|---|---|---|---|---|---|---|---|---|---|---|---|---|---|---|---|---|---|---|---|---|---|---|---|---|---|---|---|---|---|---|---|---|---|---|---|---|---|---|---|---|---|---|---|---|---|---|---|---|---|---|---|---|---|----|---|---|---|---|---|---|---|---|---|---|---|---|---|---|---|---|---|---|---|---|---|---|---|---|---|---|---|---|---|---|---|---|---|---|---|---|---|---|---|---|---|---|---|---|---|---|---|---|---|---|---|---|---|---|---|---|---|---|---|---|---|---|---|---|-----|---|---|---|---|---|---|---|---|---|---|---|---|---|---|---|---|---|---|
| AAV94935.1                 | PSTR | LRPS | PFYE | ADGVC | AMTT | YNQML | PMSY  | VSMW | DVAVER | QVQL | MGPD | AGRLAQ | ILAPR | DL   | SKCK   | IGQG  | KYVPL | CNHN | GVLI | INDP  | ILLK | LDEDR | YWL  | SI   | ADSN  | IWF  | WAEA | IARER | GLK  | VEVS | EPD   | VSP | LAVQ | GGPK | KAET | TV    | VAS  | IFG  | DW   | RD   | KY  | FW | FE | IDG | IP  | VAV | AR  | SG | WS | KQ | GG | FE | IY | L  | MD | GA | LW | IV | KE | AG | PO | QG | GG | PN | WC | ER | VE | ES | GL | VS | Y  | GG | SD   | GN   | PF   | EV   | RM | GD | T  | I  | GA | LR | IA | AE | KR | HQ | L  | G  | V  | LD | NS | -  | ED | GM | R  | I  | GD | MT | TC | V  | W  | S | Y  | RM | KN | I  | G  | F  | AL | V  | A  |   |   |   |    |   |   |   |   |   |   |   |   |   |   |   |   |   |   |   |   |   |   |   |   |   |   |   |   |   |   |   |   |   |   |   |   |   |   |   |   |   |   |   |   |   |   |   |   |   |   |   |   |   |   |   |   |   |   |   |   |   |   |   |   |   |   |   |   |    |   |   |   |   |   |   |   |   |   |   |   |   |   |   |   |   |   |   |   |   |   |   |   |   |   |   |   |   |   |   |   |   |   |   |   |   |   |   |   |   |   |   |   |   |   |   |   |   |   |   |   |   |   |   |   |   |   |   |   |   |   |   |   |   |     |   |   |   |   |   |   |   |   |   |   |   |   |   |   |   |   |   |   |
| AII87408.1                 | ATAR | LRPS | PF   | FNAE  | GTAS | YNRM  | LIPAS | VVMW | DVAER  | QVQL | LEGD | AAKLAQ | ILSPR | DL   | SKCK   | IGQG  | KYVPL | CNHN | GVLI | INDP  | ILLK | LREDE | LFWF | SI   | ADSD  | IWF  | WARA | IAAER | GLD  | VK   | ISEP  | DV  | SP   | LAVQ | GGPK | KAGAV | VSS  | IFG  | DW   | HD   | L   | KY | FW | FE  | ING | IP  | VAV | AR | SG | WS | KQ | GG | FE | IY | L  | RD | GA | LW | IV | KE | AG | AP | PF | GG | PT | S  | P  | ER | TE | ES | GL | VS | C    | GS   | SD   | DN   | PF | EV | RL | GD | V  | I  | GA | LR | IA | AE | KR | HQ | L  | G  | V  | LD | NS | -  | TD | GM | R  | I  | GD | MT | TC | V | W  | S  | Y  | RM | KN | I  | G  | F  | AL | V | A |   |    |   |   |   |   |   |   |   |   |   |   |   |   |   |   |   |   |   |   |   |   |   |   |   |   |   |   |   |   |   |   |   |   |   |   |   |   |   |   |   |   |   |   |   |   |   |   |   |   |   |   |   |   |   |   |   |   |   |   |   |   |   |   |   |   |    |   |   |   |   |   |   |   |   |   |   |   |   |   |   |   |   |   |   |   |   |   |   |   |   |   |   |   |   |   |   |   |   |   |   |   |   |   |   |   |   |   |   |   |   |   |   |   |   |   |   |   |   |   |   |   |   |   |   |   |   |   |   |   |   |     |   |   |   |   |   |   |   |   |   |   |   |   |   |   |   |   |   |   |
| ADE40415.1                 | VGPR | VRK  | SP   | FF    | NAE  | GL    | TAAS  | VYNM | YMP    | TSY  | VAMW | DVAER  | QVQL  | LEGD | AAKLAQ | ILSPR | DL    | SKCK | IGQG | KYVPL | CNHN | GVLI  | INDP | VLLK | LSEDE | VWLS | SI   | ADSD  | VLLW | AAAG | IARER | GLD | VK   | ISEP | DV   | SP    | LAVQ | GGPK | KASD | VVRV | IFG | DW | NE | I   | KY  | FW  | FE  | LE | IP | V  | L  | AR | SG | WS | KQ | GG | FE | IY | L  | RD | GA | LW | IV | AE | AG | PP | YG | GG | TP | N  | I  | ER | VE   | ES   | GL   | VS   | Y  | GG | SD | DN | PF | EV | RL | GD | V  | I  | GA | LR | IA | AE | KR | HQ | L  | G  | V  | LD | NS | -  | ID | GE | K  | F | NG | AN | AG | YV | SA | YS | SP | RL | DN | I | A | M | AM | V | A |   |   |   |   |   |   |   |   |   |   |   |   |   |   |   |   |   |   |   |   |   |   |   |   |   |   |   |   |   |   |   |   |   |   |   |   |   |   |   |   |   |   |   |   |   |   |   |   |   |   |   |   |   |   |   |   |   |   |   |   |   |   |    |   |   |   |   |   |   |   |   |   |   |   |   |   |   |   |   |   |   |   |   |   |   |   |   |   |   |   |   |   |   |   |   |   |   |   |   |   |   |   |   |   |   |   |   |   |   |   |   |   |   |   |   |   |   |   |   |   |   |   |   |   |   |   |   |     |   |   |   |   |   |   |   |   |   |   |   |   |   |   |   |   |   |   |
| BAN00949.1                 | IGPR | VRK  | SP   | FF    | WDQ  | AGLS  | AVSS  | YNHM | WL     | PMSY | VTI  | WVAA   | QQRH  | AVR  | GP     | DAD   | SI    | VQY  | VTA  | ID    | ASK  | ID    | VGI  | AA   | Y     | AP   | M    | V     | D    | H    | H     | GV  | L    | INDP | IL   | F     | H    | V    | D    | V    | E   | W  | H  | F   | S   | I   | AD  | AD | I  | R  | L  | W  | I  | D  | A  | I  | A  | R  | E  | R  | G  | A  | D  | C  | S  | V  | T  | E  | L  | D  | T  | V  | T    | L    | A    | L    | Q  | G  | P  | L  | A  | E  | A  | V  | M  | S  | D  | L  | -  | G  | V  | D  | V  | G  | M  | N  | D  | L  | E  | Q  | T  | I | D  | G  | L  | D  | V  | M  | V  | S  | R  | S | G | W | S  | T | Q | G | G | Y | E | I | F | L | D | D | P | R | L | W | T | A | V | A | S | A | G | Q | A | H | G | A | A | P | N | P | S | E | R | I | E | N | V | L | S | Y | G | T | D | T | G | Y | N | P | L | E | L | G | L | G | D | F | V | G | R | D | A | L | R | R  | I | D | A | E | R | R | L | L | G | V | V | I | D | G | - | P | R | G | A | T | T | L | G | E | L | R | A | A | A | W | S | P | R | F | A | V | N | L | G | L | A | V | D |   |   |   |   |   |   |   |   |   |   |   |   |   |   |   |   |   |   |   |   |   |     |   |   |   |   |   |   |   |   |   |   |   |   |   |   |   |   |   |   |
| AHM03102.1                 | IGPN | IRKS | P    | Y     | Y    | E     | A     | D    | R      | V    | Q    | S      | F     | S    | V      | N     | H     | M    | F    | P     | G    | H     | F    | V    | A     | M    | W    | D     | V    | A    | A     | Q   | R    | V    | E    | L     | G    | P    | D    | A    | W   | K  | L  | A   | Q   | V   | L   | T  | P  | R  | D  | L  | S  | N  | T  | M  | I  | G  | Q  | G  | R  | Y  | V  | P  | L  | C  | D  | H  | D  | G  | W  | L  | INDP | VLLP | LA   | E    | D  | R  | V  | W  | L  | S  | I  | A  | D  | S  | D  | I  | A  | L  | W  | A  | K  | A  | I  | G  | R  | E  | R  | G  | L  | D | V  | E  | H  | E  | P  | D  | V  | A  | P  | L | A | I | Q  | G | P | K | A | M | D | V | A | E | A | L | L | G | D | W | R | D | L | R | H | F | Q | F | D | L | D | G | I | P | L | I | V | A | R | S | G | W | S | K | Q | G | G | V | E | L | Y | L | Q | D | N | R | L | W | Q | M | V | K | E | A | G | A | P | W | D | GG | A | P | N | D | V | E | R | L | E | S | L | I | S | Y | G | A | D | M | R | R | N | P | F | E | M | G | M | D | F | I | G | R | S | L | R | R | I | A | D | A | A | R | R | V | F | F | V | E | G | S | P | V | G | A | T | D | V | I | A | T | I | A | W | S | G   | R | L | D | A | S | I | G | L | G | L | V |   |   |   |   |   |   |   |
| WP_071972920.1             | IGAN | V    | R    | K     | S    | A     | Y     | F    | D      | A    | D    | G      | V     | R    | S      | F     | S     | V    | N    | H     | M    | F     | P    | G    | H     | F    | V    | A     | M    | W    | D     | V   | A    | A    | Q    | R     | V    | E    | L    | G    | P   | D  | A  | V   | A   | L   | A   | Q  | L  | L  | T  | P  | R  | D  | L  | S  | L  | T  | V  | G  | Q  | G  | R  | Y  | V  | P  | V  | C  | D  | H  | E  | G  | M    | V    | INDP | VLLK | L  | G  | K  | D  | R  | V  | W  | L  | S  | I  | A  | D  | S  | D  | L  | H  | L  | W  | A  | A  | I  | G  | A  | E  | R  | G | F  | D  | V  | S  | R  | E  | P  | D  | V  | S | P | M | A  | I | Q | G | P | K | A | M | D | V | A | A | L | L | G | D | W | R | D | M | R | P | F | A | F | A | L | D | D | I | P | L | V | L | A | R | S | G | W | S | K | Q | G | G | V | E | L | Y | L | Q | D | N | R | L | W | Q | M | V | K | E | A | G | A | P | W | D  |   |   |   |   |   |   |   |   |   |   |   |   |   |   |   |   |   |   |   |   |   |   |   |   |   |   |   |   |   |   |   |   |   |   |   |   |   |   |   |   |   |   |   |   |   |   |   |   |   |   |   |   |   |   |   |   |   |   |   |   |   |   |   |   |     |   |   |   |   |   |   |   |   |   |   |   |   |   |   |   |   |   |   |
| WP_053819980.1_MMP0284874  | LSDR | LRKS | P    | Y     | E    | R     | A     | G    | A      | K    | T    | F      | T     | I    | Y      | N     | H     | M    | I    | M     | P    | T     | S    | Y    | V     | T    | M    | W     | D    | V    | A     | A   | Q    | R    | V    | E     | I    | T    | G    | S    | D   | A  | F  | K   | F   | V   | E   | Y  | I  | T  | S  | R  | D  | L  | S  | K  | L  | O  | I  | G  | Q  | G  | K  | Y  | A  | L  | I  | T  | D  | E  | D  | G  | G    | I    | INDP | ILLR | L  | G  | E  | S  | H  | F  | W  | L  | S  | I  | A  | D  | S  | D  | V  | L  | L  | W  | T  | R  | G  | L  | A  | C  | G  | L | G  | W  | D  | V  | N  | I  | C  | E  | P  | D | V | S | P  | L | A | I | Q | G | P | N | H | L | P | L | M | I | D | L | F | G | D | W | M | D | V | K | Y | F | F | F | E | L | E | G | I | P | L | I | V | O | K | S | G | W | S | K | Q | G | G | F | E | L | Y | L | R | D | G | L | W | I | I | A | N | A | G | K | K | Y  | D |   |   |   |   |   |   |   |   |   |   |   |   |   |   |   |   |   |   |   |   |   |   |   |   |   |   |   |   |   |   |   |   |   |   |   |   |   |   |   |   |   |   |   |   |   |   |   |   |   |   |   |   |   |   |   |   |   |   |   |   |   |   |   |     |   |   |   |   |   |   |   |   |   |   |   |   |   |   |   |   |   |   |
| WP_053819980.1_MMP04054243 | LSDR | LRKS | P    | Y     | E    | R     | A     | G    | A      | K    | T    | F      | T     | I    | Y      | N     | H     | M    | I    | M     | P    | T     | S    | Y    | V     | T    | M    | W     | D    | V    | A     | A   | Q    | R    | V    | E     | I    | T    | G    | S    | D   | A  | F  | K   | F   | V   | E   | Y  | I  | T  | S  | R  | D  | L  | S  | K  | L  | O  | I  | G  | Q  | G  | K  | Y  | A  | L  | I  | T  | D  | E  | D  | G  | G    | I    | INDP | ILLR | L  | G  | E  | S  | H  | F  | W  | L  | S  | I  | A  | D  | S  | D  | V  | L  | L  | W  | T  | R  | G  | L  | A  | C  | G  | L | G  | W  | D  | V  | N  | I  | C  | E  | P  | D | V | S | P  | L | A | I | Q | G | P | N | H | L | P | L | M | I | D | L | F | G | D | W | M | D | V | K | Y | F | F | F | E | L | E | G | I | P | L | I | V | O | K | S | G | W | S | K | Q | G | G | F | E | L | Y | L | R | D | G | L | W | I | I | A | N | A | G | K | K | Y  | D |   |   |   |   |   |   |   |   |   |   |   |   |   |   |   |   |   |   |   |   |   |   |   |   |   |   |   |   |   |   |   |   |   |   |   |   |   |   |   |   |   |   |   |   |   |   |   |   |   |   |   |   |   |   |   |   |   |   |   |   |   |   |   |     |   |   |   |   |   |   |   |   |   |   |   |   |   |   |   |   |   |   |
| ABF63906.1                 | FGTQ | IRKS | P    | Y     | F    | D     | R     | W    | G      | A    | K    | G      | F     | S    | V      | N     | H     | M    | I    | P     | R    | D     | F    | A    | I     | L    | C    | D     | V    | A    | V     | E   | R    | Q    | V    | E     | I    | T    | G    | P    | D   | A  | A  | K   | F   | V   | Q   | M  | L  | T  | P  | R  | D  | L  | S  | T  | M  | A  | V  | G  | Q  | C  | K  | Y  | I  | L  | I  | T  | N  | A  | E  | G  | G    | I    | INDP | ILLR | L  | R  | A  | E  | N  | H  | F  | W  | L  | S  | I  | A  | D  | S  | D  | I  | L  | L  | W  | A  | Q  | G  | V  | A  | V  | H | S  | G  | L  | D  | V  | I  | C  | E  | P  | D | V | S | P  | L | Q | L | Q | G | P | K | S | G | L | V | M | Q | E | L | F | G | E | S | I | M | D | L | K | Y | W | L | D | L | D | G | I | P | L | I | V | S | R | T | G | W | S | S | E | L | G | Y | E | L | Y | L | R | D | G | L | W | E | R | I | M | A | A | G | M | Q  | H | L | K | G | H | T | S | I | R | R | I | E | G | G | M | L | S | Y | H | A | D | A | D | I | N | P | F | E | L | G | F | D | D | F | I | G | K | A | L | K | R | I | Q | K | E | A | R | L | Q | V | L | V | I | D | A | A | P | L | N | G | E | T | I | G | K   | V | T | S | A | V | S | P | R | L | E | K | N | I | A | L | A | M | V |
| AGI71303.1                 | FGTQ | IRKS | P    | Y     | F    | D     | R     | W    | G      | A    | K    | G      | F     | S    | V      | N     | H     | M    | I    | P     | R    | D     | F    | A    | I     | L    | C    | D     | V    | A    | V     | E   | R    | Q    | V    | E     | I    | T    | G    | P    | D   | A  | A  | K   | F   | V   | Q   | M  | L  | T  | P  | R  | D  | L  | S  | K  | M  | A  | V  | G  | Q  | C  | K  | Y  | I  | L  | I  | T  | N  | A  | D  | G  | G    | L    | INDP | ILLR | L  | R  | A  | E  | N  | H  | F  | W  | L  | S  | I  | A  | D  | S  | D  | I  | L  | L  | W  | A  | Q  | G  | V  | A  | V  | H | S  | G  | L  | D  | V  | I  | C  | E  | P  | D | V | S | P  | L | Q | L | Q | G | P | K | S | G | L | V | M | Q | E | L | F | G | E | S | I | M | D | L | K | Y | W | L | D | L | D | G | I | P | L | I | V | S | R | T | G | W | S | S | E | L | G | Y | E | L | Y | L | R | D | G | L | W | E | R | I | M | A | A | G | M | E  | Y | L | K | G | H | T | S | I | R | R | I | E | G | G | M | L | S | Y | H | A | D | A | D | I | N | P | F | E | L | G | F | D | D | F | I | G | K | A | L | K | R | I | Q | K | E | A | R | L | Q | V | L | V | I | D | C | E | P | L | G | G | A | D | I | G | K</ |   |   |   |   |   |   |   |   |   |   |   |   |   |   |   |   |   |   |
