# Supplementary material for: Evolutionary history of dimethylsulfoniopropionate (DMSP) demethylation enzyme DmdA in marine bacteria
Source: PeerJ journal article supplement (doi:10.7717/peerj.9861), 2020-09-10
Supplement: Figure_S10.pdf [file Figure_S10.pdf]

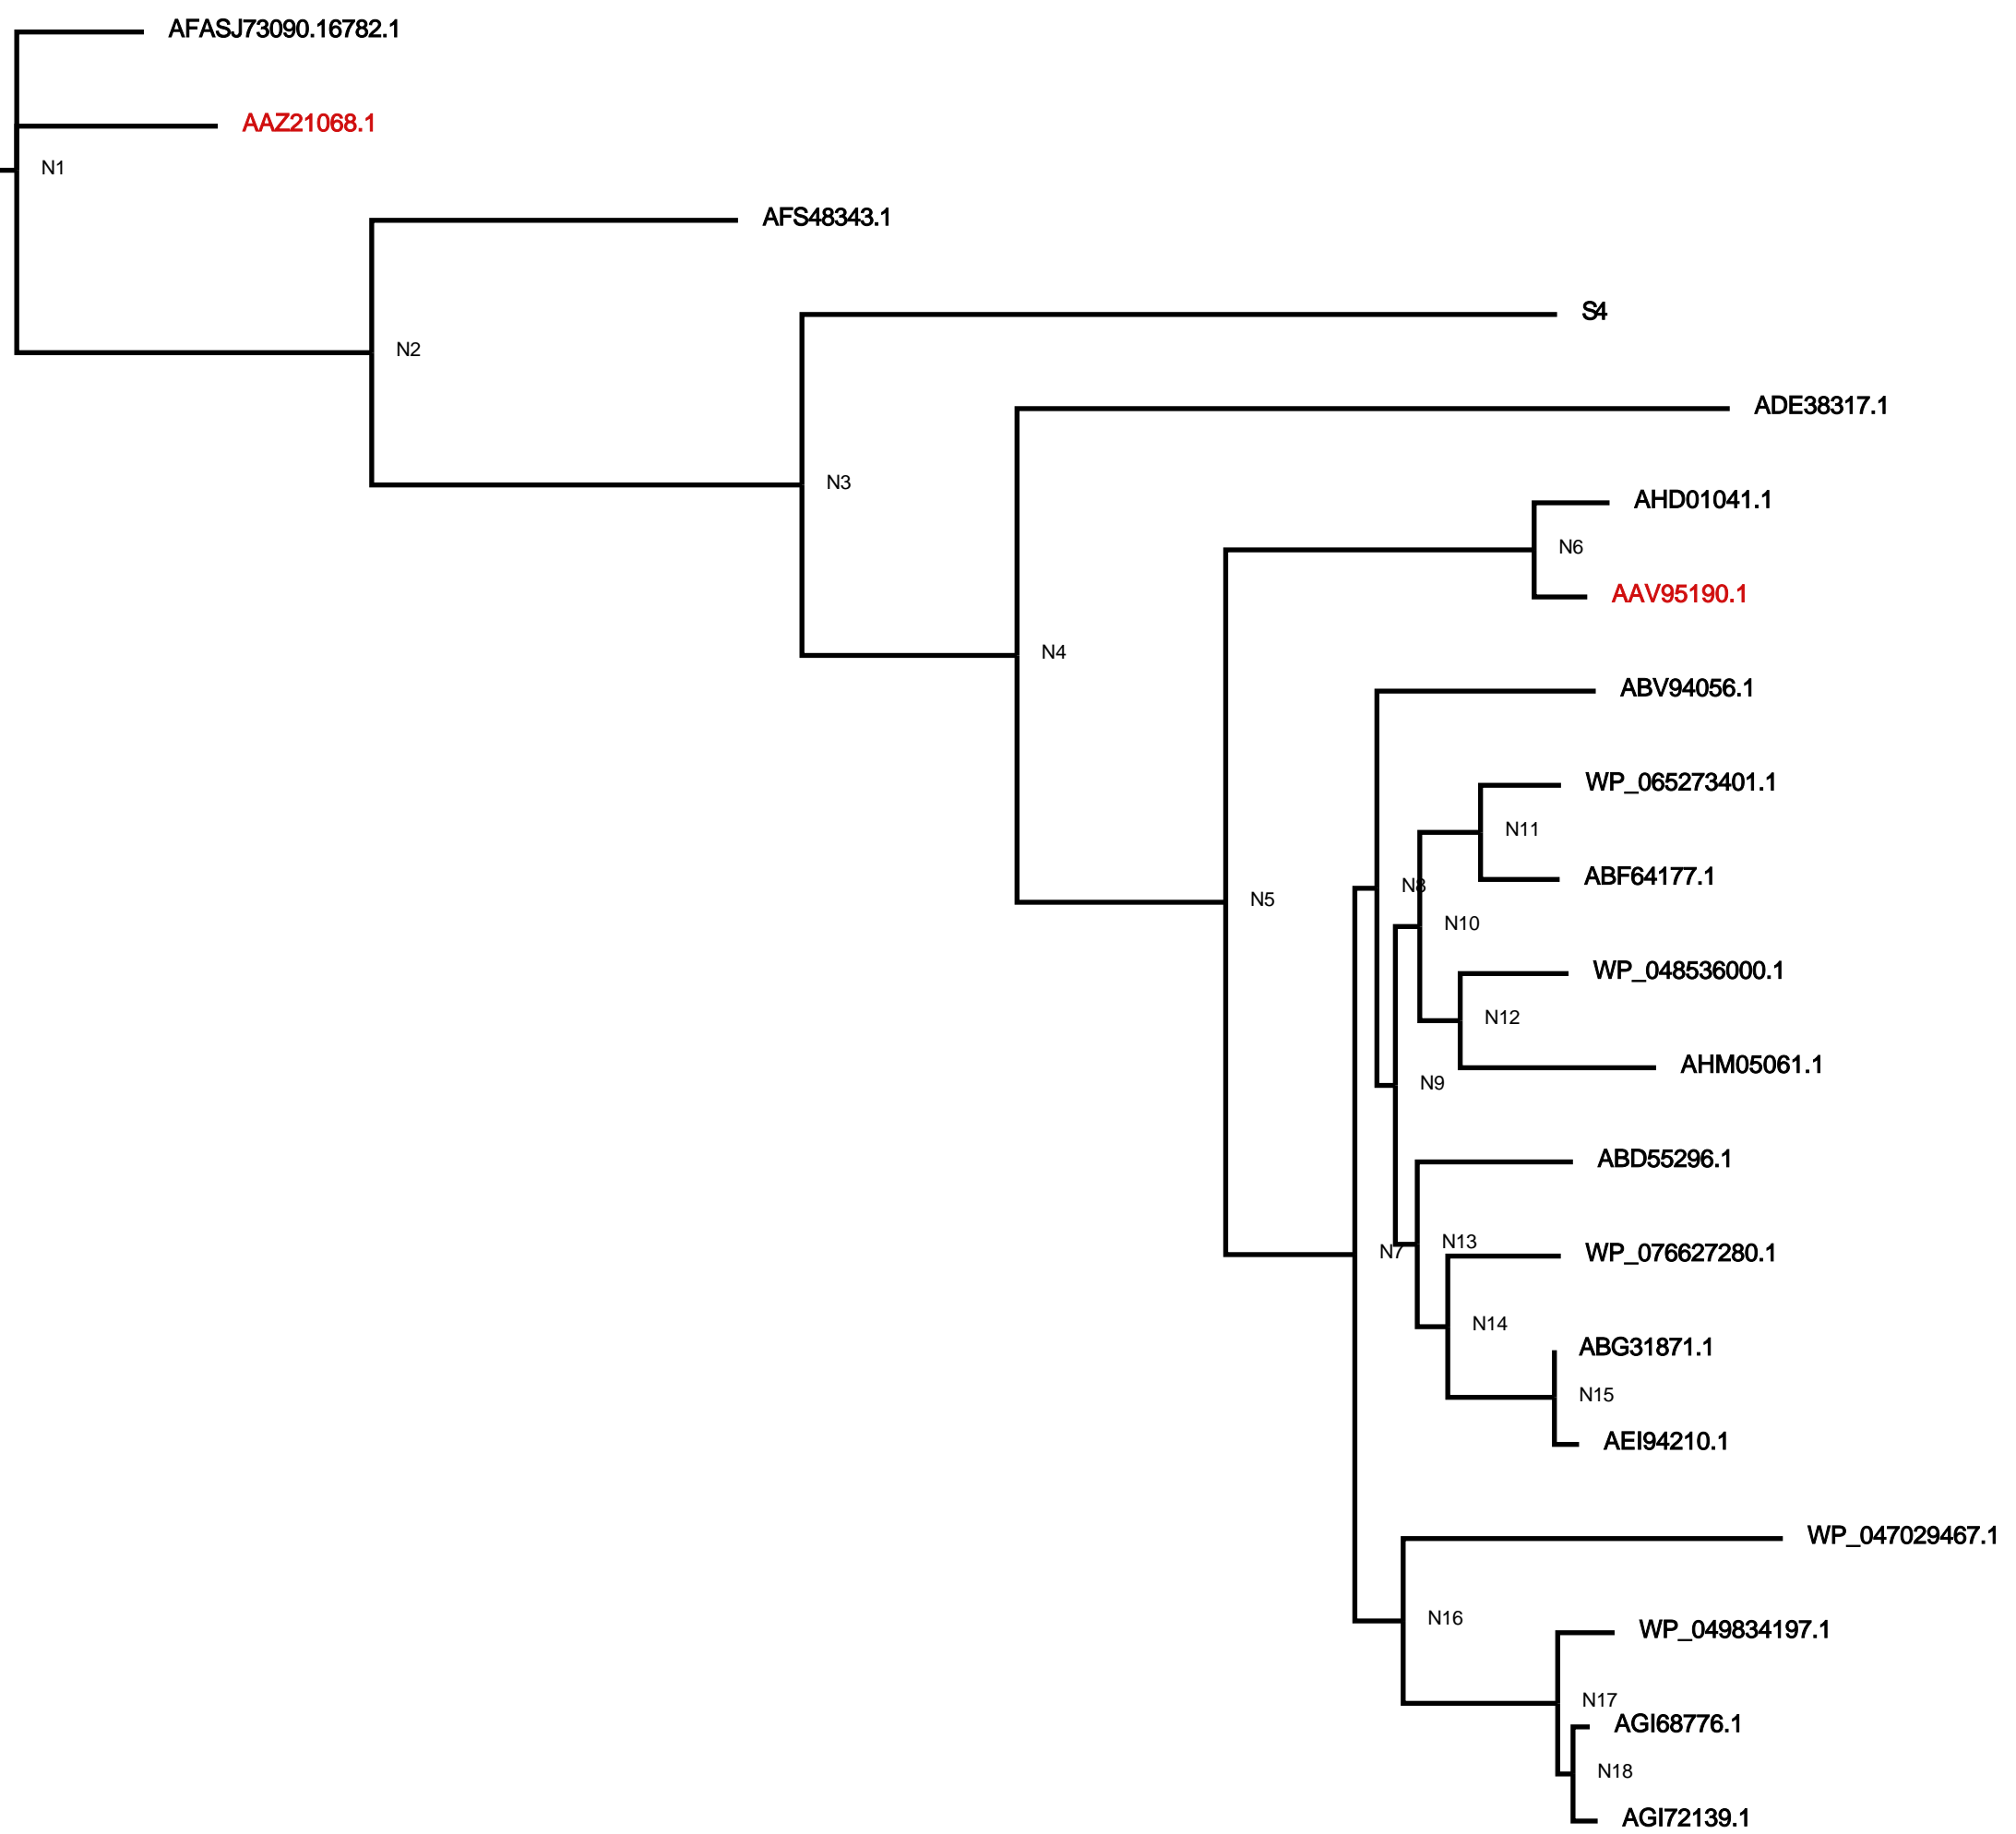

AFASJ73090.16782.1

AAZ21068.1

N1

AFS48343.1

N2

S4

ADE38317.1

N3

AHD01041.1

N6

AAV95190.1

N4

ABV94056.1

N11

WP\_065273401.1

ABF64177.1

N5

N8

N10

WP\_048536000.1

N12

AHM05061.1

N9

ABD55296.1

N7

N13

WP\_076627280.1

N14

ABG31871.1

N15

AEI94210.1

WP\_047029467.1

N16

WP\_049834197.1

N17

AGI68776.1

N18

AGI72139.1

0.3
