# Supplementary material for: Evolutionary history of dimethylsulfoniopropionate (DMSP) demethylation enzyme DmdA in marine bacteria
Source: PeerJ journal article supplement (doi:10.7717/peerj.9861), 2020-09-10

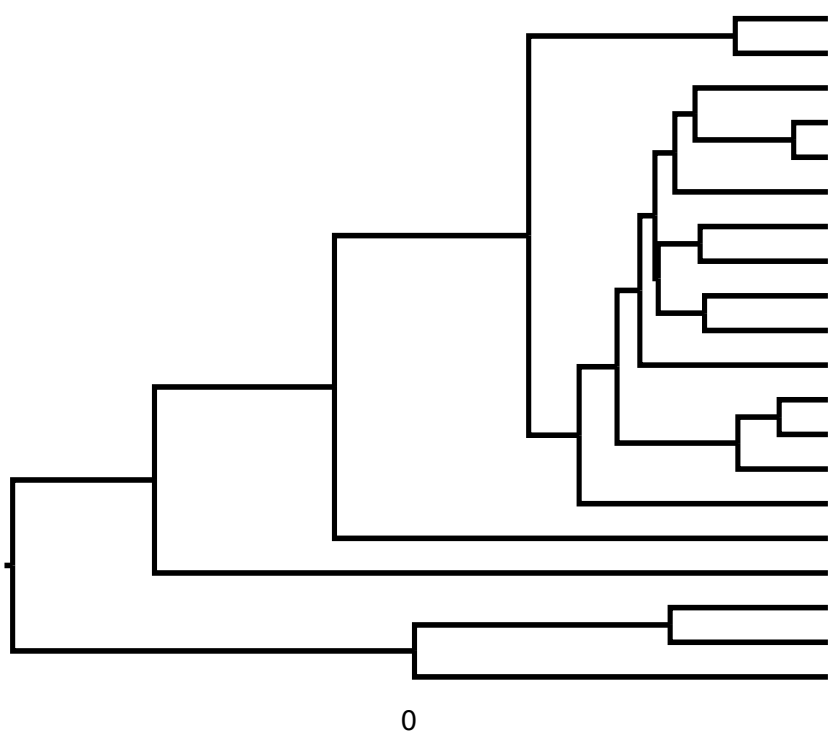

0

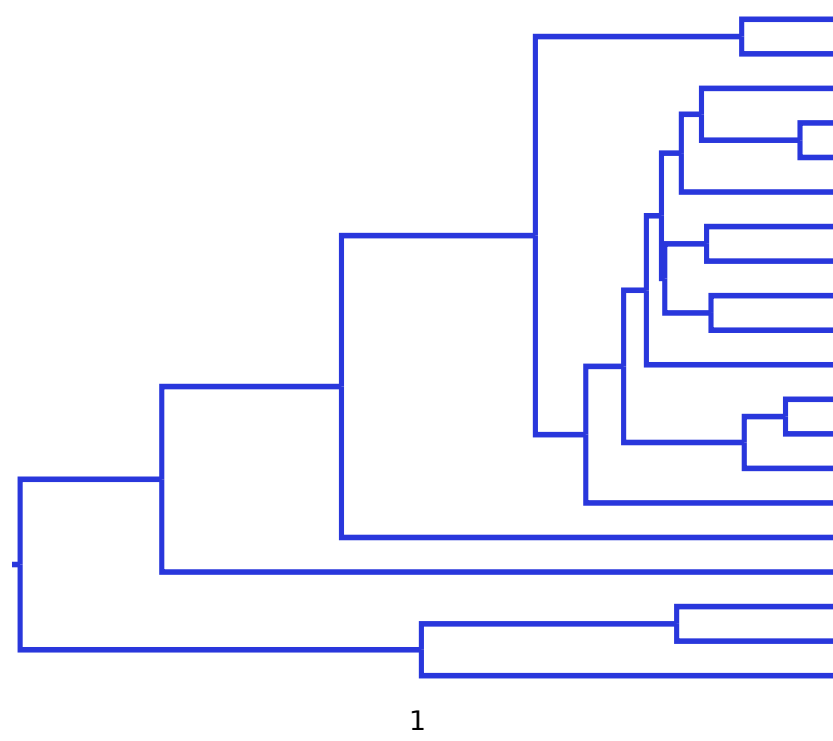

1

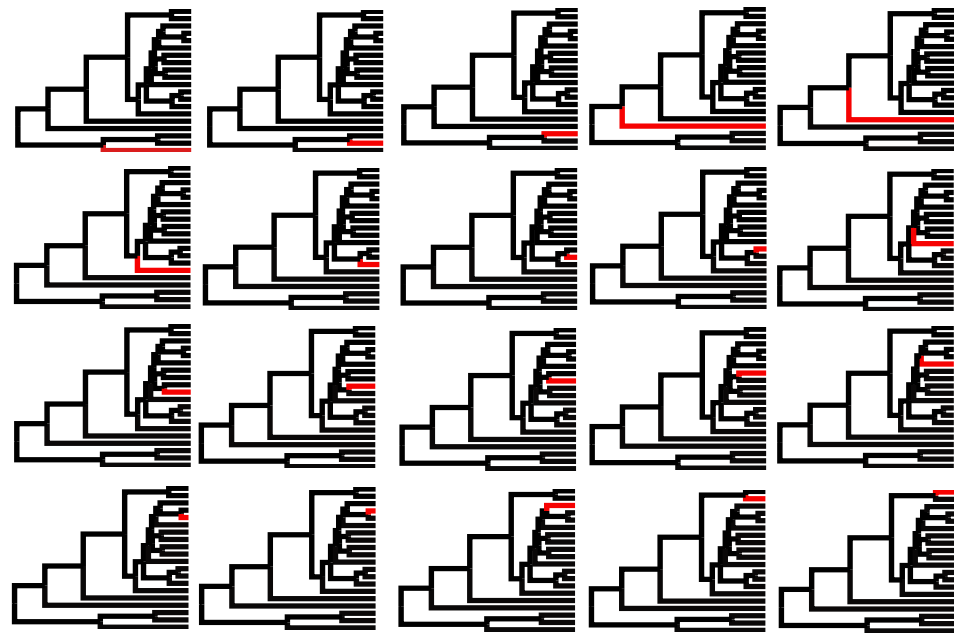

2a

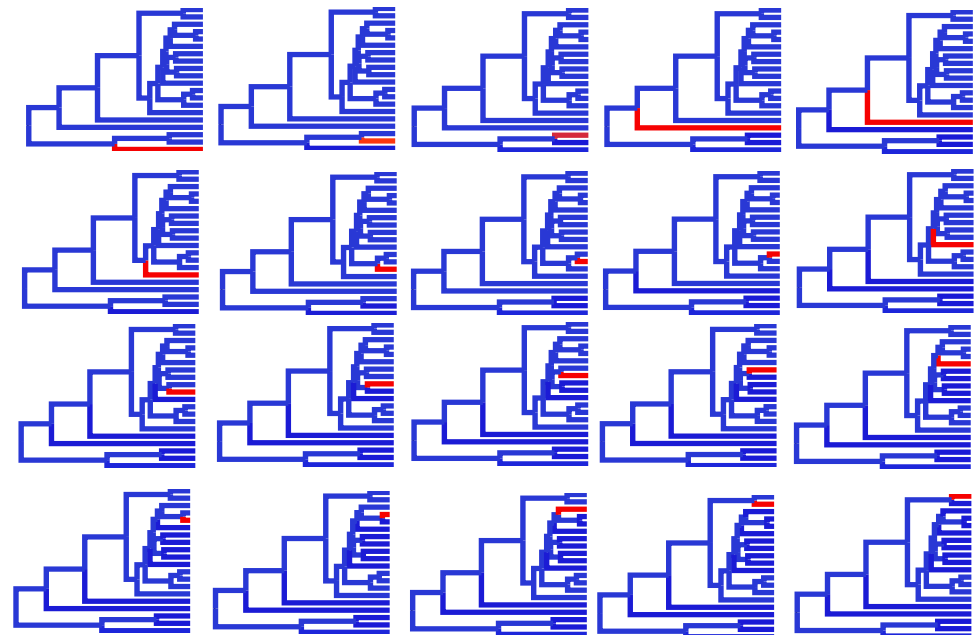

2b

Purifying selection

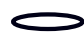

Neutral selection

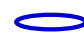

Positive selection

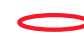

Supplement: Figure_S18.pdf [file Figure_S18.pdf]
