# Supplementary material for: Evolutionary history of dimethylsulfoniopropionate (DMSP) demethylation enzyme DmdA in marine bacteria
Source: PeerJ journal article supplement (doi:10.7717/peerj.9861), 2020-09-10
Supplement: Figure_S19.pdf [file Figure_S19.pdf]

10 20 30 40 50 60 70 80 90 100 110 120 130 140 150 160 170 180

*AFS48343.1\_DmdA* IAKSARVRS TPFTQR IE EYGVQAY TVYNNHMLLPASFVVDCCNHLKNHVQIWDVSV ERQVQIEGPDADYL TQLITC RDLSQAKDHICY YAPVVDQ GKILNDPLVMKVKNPTWVVS IADTDVLLYAKGIAIGKNLNDVNI TEPNVNPLAVQGGPKSFE LMKRVFGNLKFFNF KRYAFNNHEFLI  
*AAZ21068.1\_DmdA* IAKSRRLRSTPFTSR IEKAGGV TAYTYNNHMLLPAAFI EDSYKHLKEHVQIWDVAA ERQVEISGKDSAE LVQLMTC RDLSKSKIGRCY YCPIIDENGNLVNDPVVLKLDENKWWI S IADSDVIFFAKGLASGHKFDVKEI VEPVVDIMAIQGGPKSFA LMEKVFGE LKFFGFDFYDFEGTKHLI  
*ASJ73090.1\_DmdA* IFTFSRRLRSTPFTDR I EAGGASQSF TVYNNHTLLPAAFLEGDYWHLVEHVQVWDVSCERQVQLKGPDAEMLVQLMTPRDL SKAQPDQCFY YVICDERGHILNDPIAIKVDDD TWVLSLADSDIYLWAKGLALGKGLDVEI RADVWP IAVQGGKAE TLMARVFGSIRFFRYKRYLAFNGHAFIV  
*WP\_047029467.1\_DmdA* LLSISRTRRTPFTDRV I TAAGASQSF TVYNNRMLLP TVFVEEDYHHLKTA VQVWDVACERQVEIRGPQAAELVQMLTPRDLSEMVVQC L YTPMVDE TGGMLNDPVTVKLEEDRYWV S IADSDLLLWVKALAVGFR LAVDVI EPDVSPLAIQGGP R ADDL AARVFGSIRFFRYKRLAFNGVDLVV  
*ADE38317.1\_DmdA* LNMSRRI RRSPTFDKVEEYGV RGF SVNNHMLLPKAFVEDDYWHLREHVQIWDVGVQRQVQITGLDAARLVQMMTPRDRVQAKIGQCL YVPMIDEDAGMLNDPVLIKLADDKFWLS IADSDILLWVKGLALGLKLVNDVEEPDVSPLAIQGGPKAIALMADLFGDLGYFQYGFIDVLGTRQLI  
*ABV94056.1\_DmdA* LSLARRLRRTPFSEGV EAGV RAY TVYNNHMLLP TVFVEEDYHHLKQKVQVWDVSCERQVELRGPDAGKLMQLLTPRDLRGLM PGQCL YVPMVDE TGGMLNDPVALKLESDRFWIS IADSDLLLWVKALANARQLEVLVEEPDVSPLAVQGGP R ADDLVERVFGSLRFRFRFGFFQFQGHDLVV  
*ABD55296.1\_DmdA* ISPSRRLRRTPFSDGVEASGVKAYTYNNRMLLP TLFVEEDYHHLKSAVQLWDVSV ERQVEVRGPDAGRLVQMLTPRDLRGLM PGQCY YMPVVD E TGGMLNDPVVLKLAEDRWWI S IADSDLLLWVKGVAQGYRLDVLVDEPDVSPLAVQGGPKADELMARVFGDVRFRFRGWFDFQGHDMV  
*AHM05061.1\_DmdA* LLSLRRLRRTPTFTEGVLAAGVGTGYTVYNNHMLLP TVFVEEDYHHLKSAVQVWDVSCQRQVEVRGPDAGRLVQMLTPRDLRGLM PGQCY YMPIVDE TGGMLNDPVVVKLTEDRWWI S IADSDLLYVVKGIAYGYRLDVLVDEPDVSPLAVQGGP R ADDLMAE VFGDLRFRFRFGLFGFGGRQLVV  
*AFS46782.1\_DmdA* IAKSRRLRSTPFTSR IEKAGGV TAYTYNNHMLLPAAFLEESCDHLKQDVQVWDVAA ERQVEIVGKDAAKLVQLMTC RDLSISKIGRCY YCPIIDENGMVNDPVILKLDENRFWIS IADSDVIFFAKGLAHGHKFDVNI FEPNVDI IAVQGGPKSFA LMEKIFGDLKFFGFDFYDFEGTKHLI  
*AHD01041.1\_DmdA* IFPSRRI RRTPFSGVEAAGV KGY TVYNNHMLL A TVFLE YDCAHLKEHVQVWDVSCERQVSIKGPDA LRLLKLISPRDMDRMADDQCY YVPTVDHNGGMLNDPVAVKLAADHYWLSLADGDL LQFALGIAIARGF DVEI VEPDVSPLAVQGGP R ADDL MARVFG EIRFFRYKRLAFQGV ELVV  
*AGI68776.1\_DmdA* ISGSRRI RRTAFSDGVEAAGV KGY TVYNNHMLL P TVFIVEDYHHLKSAVQVWDVA ERQVEIRGPDAGRLMQMLTPRDLRAMLPGM CY YVPMVDE TGGMLNDPVAVKISEDRYWV S IADSDLLFWVKGLAYGLRLDVLVDEPDVSPLAIQGGPKADELAARVFGDLKFFRYGHFDFQGHDMIV  
*AGI72139.1\_DmdA* ISGSRRI RRTAFSDGVEAAGV KGY TVYNNHMLL P TIFIVEDYHHLKSAVQVWDVA ERQVEIRGPDAGRLMQMLTPRDLRAMLPGM CY YVPMVDE TGGMLNDPVAVKISEDRYWV S IADSDLLFWIKGLAYGLRLDVLVDEPDVSPLAIQGGPKADELAARVFGDLKFFRYGHFDFQGHDMIV  
*ABG31871.1\_DmdA* ISPSRRLRRTPFSDGVEAAGV KAYTYNNRMLLP TVFVEADYRHLKEHVQVWDVSV ERQVELRGPDAARLVQMLTPRDLRGLM PGRCFY YVPIVDE TGGMLNDPVAVKLAEDRWWI S IADSDLLLWVKGISNGYRLDVLIDE PDVSPLAIQGGPKADELAARIFGDIKFFRFGLF EFEGREMVV  
*AEI94210.1\_DmdA* ISPSRRLRRTPFSDGVEAAGV KAYTYNNRMLL A TVFVEADYRHLKEHVQVWDVSV ERQVELRGPDAARLVQMLTPRDLRGLM PGRCFY YVPIVDE TGGMLNDPVAVKLAEDRWWI S IADSDLLWVKGISNGYRLDVLIDE PDVSPLAIQGGPKADELAARIFGDIKFFRFGLF AFEGREMVV  
*AAV95190.1\_DmdA* IFPSRVRRTPF SAGVEAAGV KGY TVYNNHMLL P TVFLQADCAHLKEHVQVWDVACERQVSIQGPDAARLMKLI SPRDMDRMADDQCY YVPTVDHRGGMLNDPVAVKLAADHYWLSLADGDL LQFGLGIAIARGF DVEI VEPDVSPLAVQGGP R ADDL MARVFGD I RFFRYKRLAFQGV ELVV  
*ABF64177.1\_DmdA* ISLSRRLRRTPFSEGV EAGV KGY TVYNNHMLL P TVFVEADYHHLKRHVQVWDVACERQVELRGPDAGRLMQMLTPRDLRGMMPGQCY YVPIVDE TGGMLNDPVAVKLAEDRWWI S IADSDLLYVVKGIANGWRLDVLVDEPDVSPLAVQGGPKAEDLMARVFGA I RFFRFGVYQFEGRDLVV  
*WP\_048536000.1\_DmdA* ISPSRRLRRTPFSEGV EAGV KAY TYNNHMLL P TVFMQEDYRHLKEAVQVWDVACERQVELRGPDASRLMQMLTPRDLRSMLPGQCY YVPIVDE TGGMLNDPVAVKLAEDRWWI S IADSDLLYVVKGLAYGYRLDVLVDEPDVSPLAVQGGPKSDDLMAAVFGD I RFFRYKVLDFQGRDLVV  
*WP\_049834197.1\_DmdA* IAGSRRI RRTPFSDGVEASGV KGY TVYNNHMLL P TVFVEEDYHHLKSAVQVWDVSV ERQVEIRGPDAAKLMQMLTPRDLRGLM PGM CY YVPMVDE TGGMLNDPVAVMI TDDRYWV S IADSDLLFWVKGLAYGLRLDVLVDEPDVSPLAIQGGPKADELAARVFGDLKFFRYGWFDFQGGQMLV  
*WP\_065273401.1\_DmdA* ISPSRRLRRTPF S QGVEEAGV RAY TVYNNHMLL P TVFVEADYHHLKNHVQVWDVACERQVELRGPDAGRLMQMLTPRDLRGM TAGQCFY YVPIVDE TGGMLNDPVAVKLAEDRWWI S IADSDLLYVVKGIANGWRLDVLVDEPDVSPLAVQGGPKAEELMVRVFGN I RFFRFGVYQFQGHDLVI  
*WP\_076627280.1\_DmdA* ISPSRRLRRTPFSDGVEAAGV KAYTYNNRMLLP TVFVEADYRHLKDHVQVWDVSV ERQVELRGPDAGRLMQMLTPRDLRRMLPGQCY YVPIVDE TGGMLNDPVAVKLESDRWWI S IADSDLLLWVKGIANGYRLDVLVDEPDVSPLAIQGGPKAEELVSRVFGD I RFFRFD MFQFEGYDLAI

\* 190\* 200 210 220 230 240 250 260 270 280 290 300 310 320 330

*AFS48343.1\_DmdA* ARSGWSKQGGFEIYVDHDDIGVQLYDQLLREGKDLGARPGCPNLIERIESGLLSYGNMDMNDNTPLECGLDADFVSFNPDYLGKEVLKKKQQQVSRSLGIMMDSVTQHLPI NGEQIGTLRSACYS P DFGKCLGIMIDKTH TLDQDLKLI SAKMTN  
*AAZ21068.1\_DmdA* ARSGWSKQGGFEIYVEN TQSGQKLYDHLLEFVKGKEFN VGP GCPNLIERIESALLSYGNDFDNDNPFECGFDQYVSLDSDLGKEKLEIKLKPQKLGVKIDSLTGSKN IENNVIGELRSACYS PHFQKIGIMIKKSHEASQGFKIQINGNVCD  
*ASJ73090.1\_DmdA* ARSGWSGQGGFEIYIDDAELGQELWDEL FVVGADLNVGHGCPNNIERMETGLLSFGSDMDYSHTP LQCGLDRYCQLD TDSMSIAALREQRAQPTRLVGIVAPAASKYCQLADGPVGDITSQSLSGRYDAWIAFLIDRLKNESVKLQLLHDARYSE  
*WP\_047029467.1\_DmdA* ARSGYSKQGGFEIYVEGGQNGEPLWDALFEAGRDLDVRAGCPNLIERIEAGMLSYGNDMTRANTPHECGLGRFC DTRSACVGRDALLRVAREPLKQIYLEIEPCPEPMMVAGGLVQITSAWS P DFN TNVAIMIGRDCDEGTVVDVARSARVRD  
*ADE38317.1\_DmdA* ARSGYSKQGGFEIYLHGGLGSDLWDM IYQAGKQYNI MPGCPNLIERIEGGLMSYGNEFTRDNNPLECGFEELCYFGDDYIGKIALRRIAEEPQKLGIFKFGPCGKPLVTRDHIGQITSGIYSPRLKCNVGMMAKGHDFGT VVFVHREGTVSP  
*ABV94056.1\_DmdA* ARSGYSRQGGFEIYVEGSDLGMPLWHALFEAGADLDVRAGCPNGIERVEGGLLSYGNDMTRANTPHECGLERFCNVQ TACLGRDALLRVSM DPNRQIP I EIVCDRAWRLAGDHVQVTSAAWS P DFD TNVAIMVRMTHDPDTELMVERPARVQE  
*ABD55296.1\_DmdA* ARSGYSKQGGFEIYVEGGDLGMPLWNLMEAGRDLDVHAGCPNLIERIEGGLLSYGNDMTDDNTPHECGLGRFCNTATACIGRDALLRVAKEPVQVAIAIDSCDRAWPLAGKRVQLTSAAYS P DYSEGVAIMVRMTHDPGTQLHVQMPAEVRE  
*AHM05061.1\_DmdA* ARSGYSKQGGFEIYLEGGDLGMPLWSALIEAGRALDVRAGCPNLIERIESGLLSYGNDMTDDNTPHECGLGRFCNTATACIGRDALLRVAKEPVQIPLAMSAVEEFWPVAGHKVGRVSSAAFS P DFGVNVSIMIRMTHDAGATLVMREAVVKE  
*AFS46782.1\_DmdA* ARSGWSKQGGFEIYVEN TSSGVQLYDKLFE E GKDLNVKAGCPNLIERIESGLLSYGNDFDNDNPFECGF EKYVNL DNNFLGKEKLDIKSKIERKLGVILDSITKSLDIENEKIGDLRSACFS PHFKKVI GIMISEPFKASQTVYLN VSGKVCD  
*AHD01041.1\_DmdA* ARSGWSKQGGFEIYVEGADLGMPLWDALFEAGEDMHVRAGCPNTIERIESGLLSYGNDMTRENTPYECGLGKFCNSPEDYIGKAALAEQAANPARQIPLVISPCLDAWPLADGQVGVGSAIFS P EFGVNAAIMVDQSHAPGTVMEVDLPATVQD  
*AGI68776.1\_DmdA* ARSGYSRQGGFEVYVEGSHLGMPLWNLMEAGKDLDVHAGCPNVIERIEGGLLSYGNDMNRDNTPHEAGLGRFCS TQTACVGRDALLRVSKEPVKQVALRIEPCDRGWPLDGQQVGTITSAVWS P DFE TNVAIMVRMTHDP TTDLDVVFPTVVQE  
*AGI72139.1\_DmdA* ARSGYSRQGGFEVYVEGSHLGMPLWNLMEAGKDLDVHAGCPNLIERIEGGLLSYGNDMNRDNTPHEAGLGRFCS TQTACVGRDALLRVAKEPVQVALRIEPCDRGWPLDGQQVGTVTSATWS P DFE TNVAIMVRMTHDPA TDL D VVFPAVVQE  
*ABG31871.1\_DmdA* ARSGYSKQGGFEVYVEGSIAMPLWDALFEKAGEDLNVRAGCPNGIERIEGGLLSYGNDMTDDNTPHECGLGRFC D TQTACIGRDALLRVAKEPVQIAIAIELCDRAWGLAGDRVQVTSAAWS P DHH TNVAIMVRMTHDGTGLRVRERATVQA  
*AEI94210.1\_DmdA* ARSGYSKQGGFEVYVEGADIAMPLWDALFKAGEDLNVRAGCPNGIERIEGGLLSYGNDMTDDNTPHECGLGRFC D TQTACIGRDALLRVAKEPVQIAIAVELCDRAWGLAGDRVQVLSAAWS P DHQ TNVAIMVRMTHDGTGLRVEREATVQA  
*AAV95190.1\_DmdA* ARSGWSKQGGFEIYVEGSELGMPLWNLFAAGADLNVRAGCPNNIERVESGLLSYGNDMTRENTPYECGLGKFCNSPEDYIGKAALAEQAANPARQIALVIGPCQDAWPLADGQVGVGSAIHS P EFGVNVAIMVDRSHAPGTGMEVERPVTVRE  
*ABF64177.1\_DmdA* ARSGYSKQGGFEIYVEGGDLGMPLWNLFEAGADLEVRAGCPNLIERIESGLLSYGNDMTDDNTPHECGLGRFCNTH TACIGRDALLRVAKEPVQIPIEISP CDQFWPLANGRVGRVSSATWS P DHA TNVAIMVKMTHDAGTQLEVERTALVRE  
*WP\_048536000.1\_DmdA* ARSGYSKQGGFEIYVEGSDIGMPLWHALMEAGRSLDVHAGCPNGIERVEGGLLSYGNDMTDDNTPHECGLGKFCNTQTACIGRDALLRVAVEPVKQIP I AMGGCDRFPW IAGDIVGRVSSAAWS P DFD TNVAIMIRMTHDPGTEVTVVERPATVKD  
*WP\_049834197.1\_DmdA* ARSGYSKQGGFEVYVEGTDNGMPLWNLMEAGKDLDVYAGCPNLIERIEGGLLSYGNDMNRDNTPHEAGLGRFCS TQTACVGRDALLRVSKEPVKQVALRIEPCDRGWPLDGQQVIVTSSAAWS P DFE TNVAIMVRMTHDPTVTVVFPATVQE  
*WP\_065273401.1\_DmdA* ARSGYSKQGGFEIYVEGSEFGMPLWRKLF EAGEDLQVRAGCPNLIERIEGGLLSYGNDMTDDNTPHECGLGRFCNTH TACIGRDALLRVAKEPVQIPIAIDPC TQFWP VAGGPAGRIS SAAWS P DFR TNVAIMIRMTHDAGSRLEVERTATVRE  
*WP\_076627280.1\_DmdA* ARSGYSKQGGFEIYVPDSAIGMPLWNLFDAGEDLQVRAGCPNGIERIEGGLMSYGNDMTDDNTPHECGLGRFC D TQTACIGRDALLRVSKEPVQIPIA IHTCDRPWPLAGGRVQITSAAWS P DFK TNV SIMVRMTHDPGTDL E VERRATVQK
