# Supplementary material for: Evolutionary history of dimethylsulfoniopropionate (DMSP) demethylation enzyme DmdA in marine bacteria
Source: PeerJ journal article supplement (doi:10.7717/peerj.9861), 2020-09-10

Multiple sequence alignment of protein sequences from various species, including DmdA and Lupas\_21. The alignment shows conserved regions across different taxa, with amino acid residues color-coded by type. The sequences are aligned in a grid format, with columns representing individual residues and rows representing different protein variants.

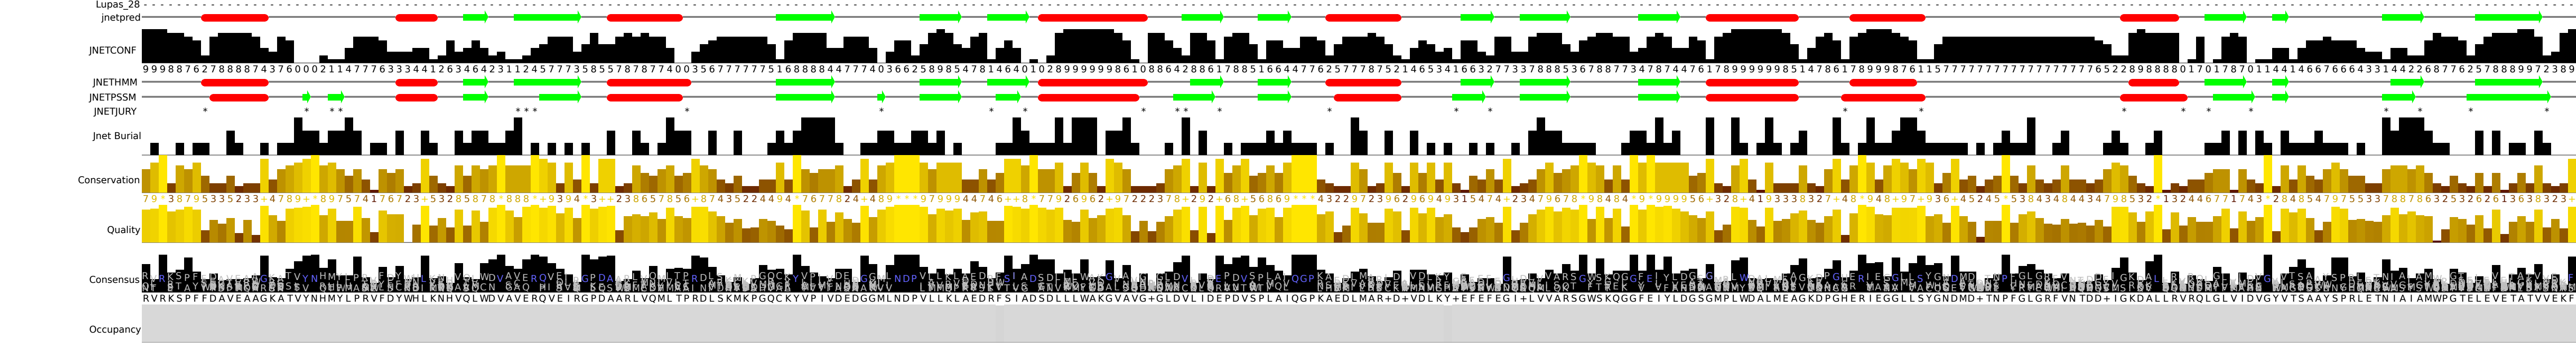

Supplement: Figure_S22.pdf [file Figure_S22.pdf]
