# Supplementary material for: Evolutionary history of dimethylsulfoniopropionate (DMSP) demethylation enzyme DmdA in marine bacteria
Source: PeerJ journal article supplement (doi:10.7717/peerj.9861), 2020-09-10
Supplement: Figure_S23.pdf [file Figure_S23.pdf]

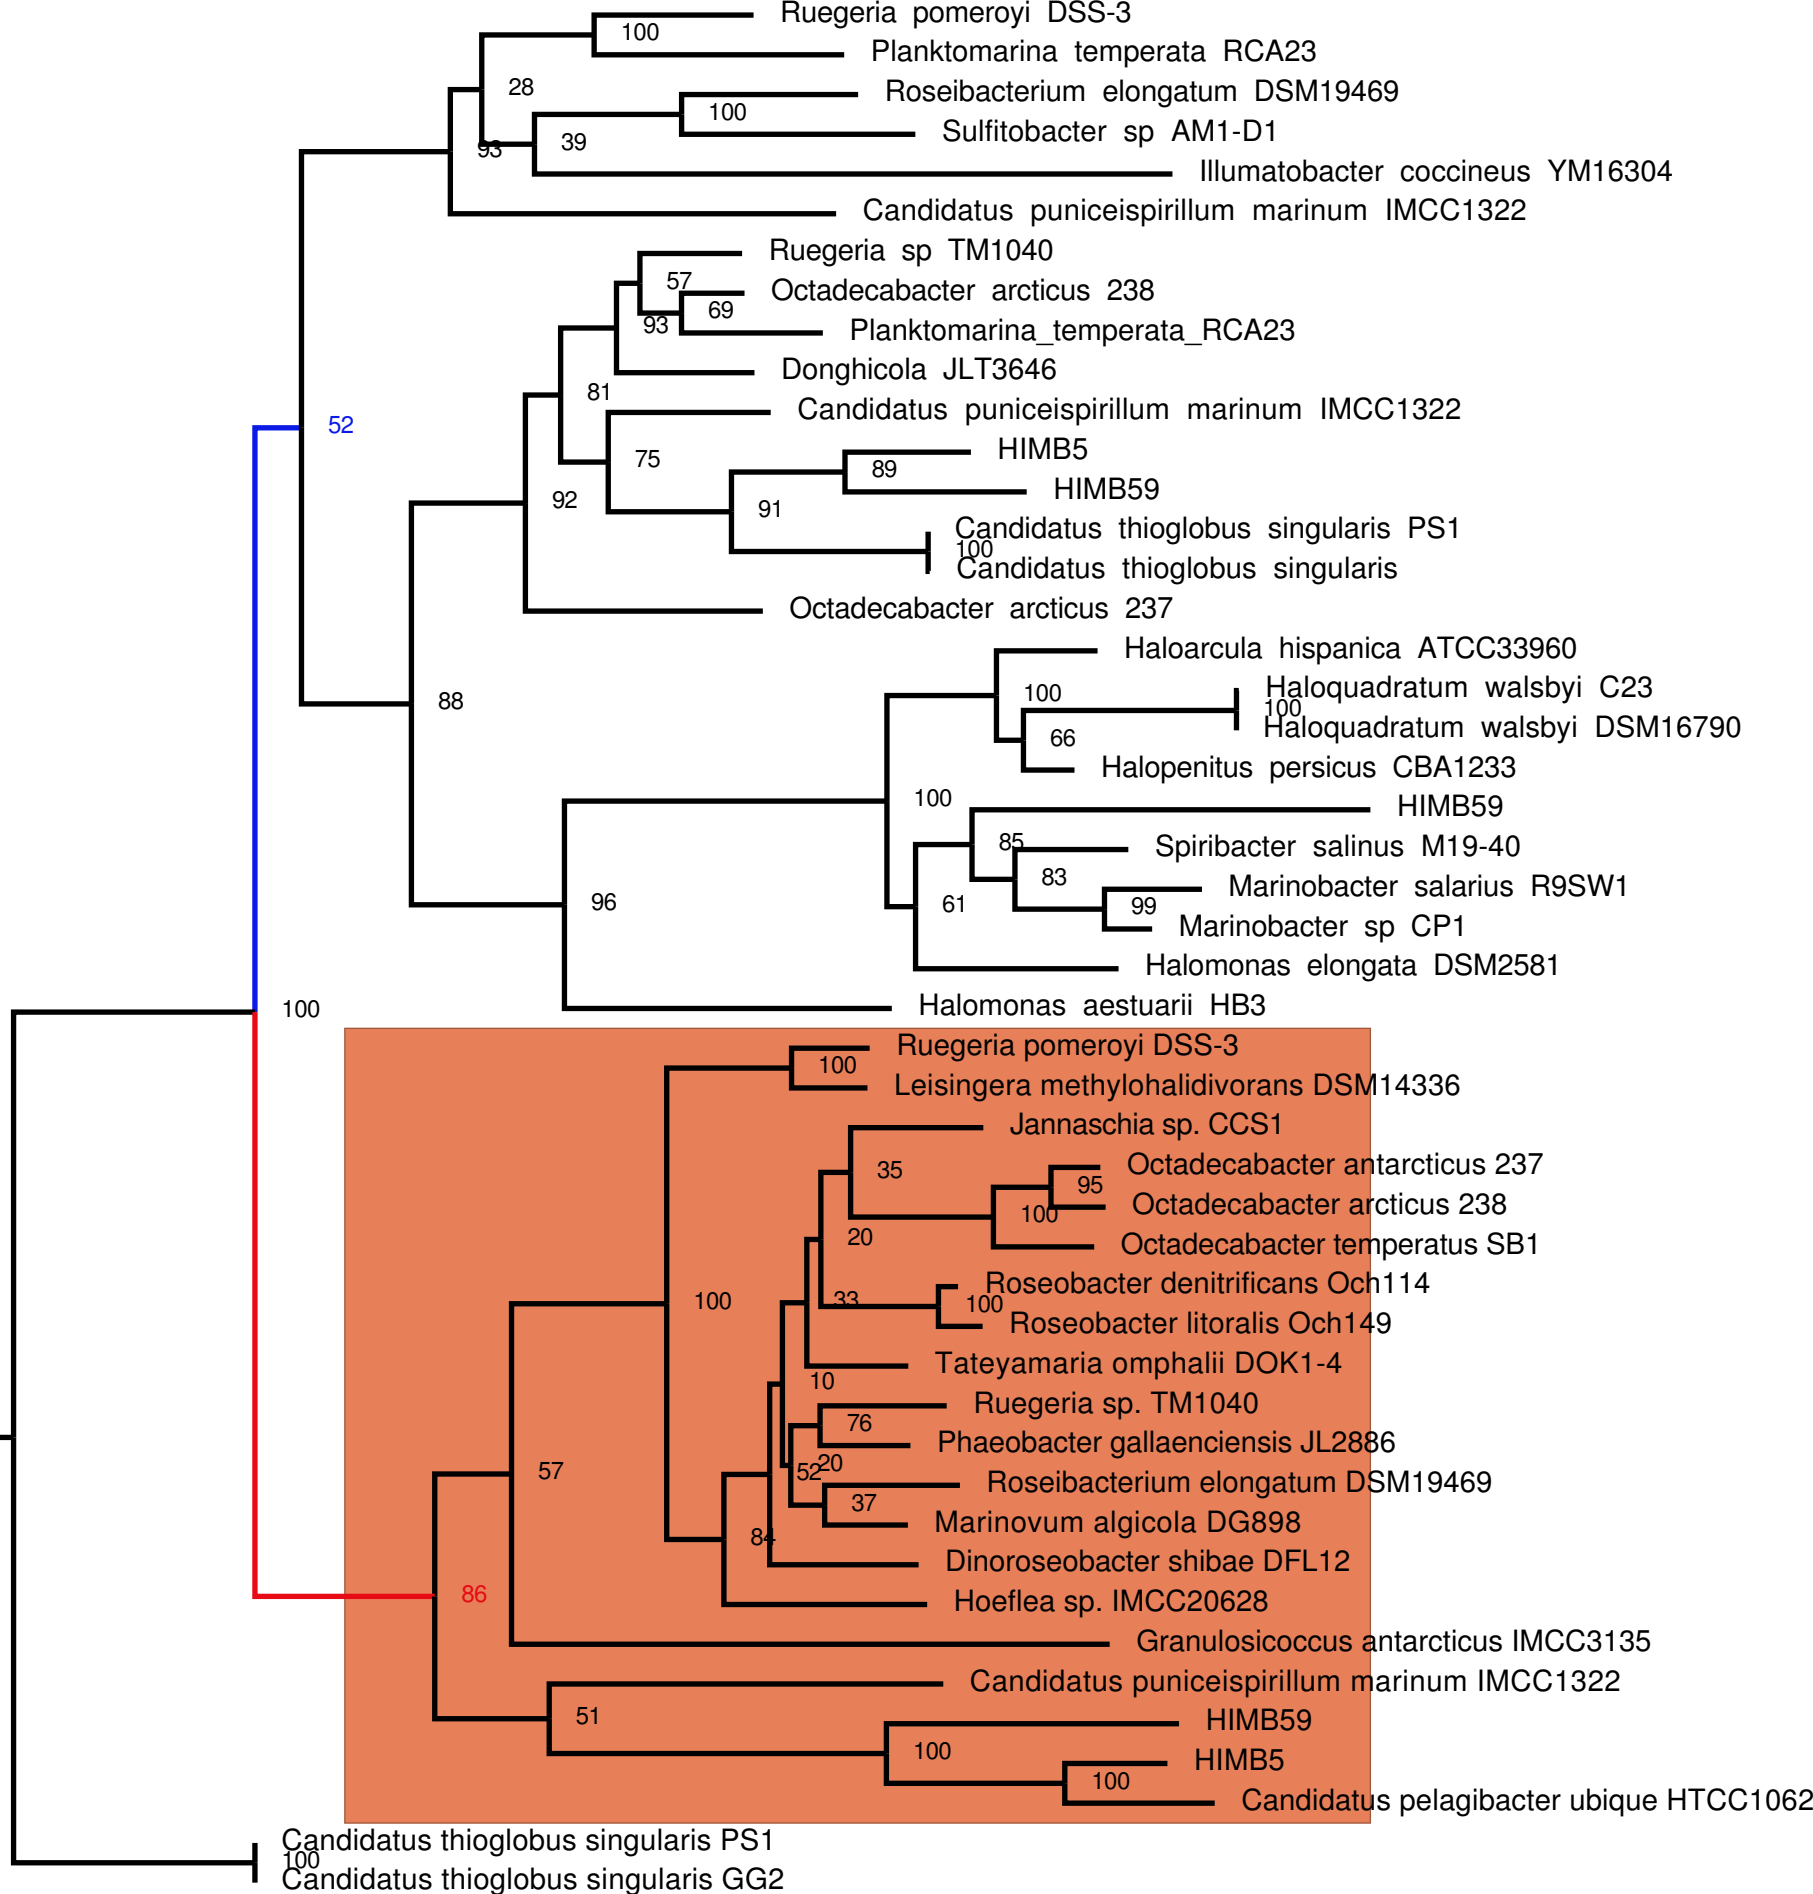

0.2
