# Supplementary material for: Evolutionary history of dimethylsulfoniopropionate (DMSP) demethylation enzyme DmdA in marine bacteria
Source: PeerJ. 2020 Sep 10;8:e9861. doi: 10.7717/peerj.9861 (PMC7487153; doi:10.7717/peerj.9861)
Supplement: Supplemental Information 13 [file peerj-08-9861-s013.pdf]

A0A1Z9TVH2\_9RHOB Dimethylsulfoniopropiona... 1.0E-161

E-value 0.0 1E-181 1E-171 1E-166 1E-161

European Bioinformatics Institute 2006-2014. EBI is an Outstation of the European Molecular Biology Laboratory.
